# Supplementary material for: Exploring probiotic awareness, perceptions, and practices in the Saudi population: a cross-sectional study
Source: PeerJ. 2025 Dec 5;13:e20490. doi: 10.7717/peerj.20490 (PMC12684406; doi:10.7717/peerj.20490)
Supplement: Supplemental Information 1 [file peerj-13-20490-s001.xlsx]

## Sheet: Answers
Are you willing to participate in the questionnaire?	Age	Gender	Educational level	Region	Marital status	Monthly income	Occuption	Probiotics are dead microorganisms, that when administered in adequate amount, confer a health benefit to the host	Probiotics are substances that make food taste sweeter	Probiotics are cleaning products to help kill bacteria on fruit and vegetables	Probiotics are a type of vitamin to help health	Probiotics can be used to prevent/cure viral infections	Milk might contain a probiotic	Yoghurt might contain a probiotic	Probiotics can be given to children	Consuming probiotics in all forms is safe for health	Dietary sources of probiotics are better than pharmaceutical supplements	Implementing probiotics in our daily meals improves health and reduces illness	There`s a minor use of probiotics by people in Saudi Arabia	There`s a lack of advertising probiotics and their benefits in Saudi Arabia	The high cost of probiotics is one reason why people are reluctant to use probiotics	Have you ever taken a probiotic	If you have used probiotics, which form of probiotic did you prefer to use	Are you willing to continue using probiotics	If you did not use probiotics, what are the main reason for not using probiotics	Are you willing to use probiotics in future	Would you use probiotics if they were recommended by your health care provider
Yes	30 years or less	Female	High school or less	Center	Unmarried	Less than 10000 SR	Non- healthcare worker	FALSE	FALSE	FALSE	FALSE	FALSE	FALSE	TRUE	TRUE	Neutral	Strongly agree	Strongly agree	Agree	Neutral	Disagree	Yes	Natural sources	Yes
Yes	30 years or less	Female	Diploma or Bachelor	Center	Unmarried	More than 20000 SR	Non- healthcare worker	FALSE	FALSE	FALSE	FALSE	FALSE	TRUE	TRUE	TRUE	Disagree	Strongly agree	Agree	Agree	Strongly agree	Disagree	Yes	I have no preference (both can be used)	Yes
Yes	30 years or less	Female	Diploma or Bachelor	Center	Unmarried	Less than 10000 SR	Healthcare worker	TRUE	FALSE	FALSE	FALSE	FALSE	TRUE	TRUE	TRUE	Agree	Neutral	Agree	Agree	Strongly agree	Strongly agree	No			I don’t believe I need them	Don't know	Yes
Yes	More than 30 years	Female	Postgraduate	West	Married	From 10000 to 20000 SR	Non- healthcare worker	TRUE	TRUE	TRUE	TRUE	TRUE	TRUE	TRUE	TRUE	Agree	Agree	Strongly agree	Neutral	Agree	Strongly agree	Yes	Natural sources	Yes
Yes	More than 30 years	Female	Postgraduate	East	Married	Less than 10000 SR	Non- healthcare worker	TRUE	TRUE	FALSE	FALSE	TRUE	FALSE	TRUE	TRUE	Neutral	Agree	Agree	Strongly agree	Strongly agree	Disagree	Yes	Natural sources	Don't know
Yes	More than 30 years	Female	Postgraduate	Center	Married	From 10000 to 20000 SR	Non- healthcare worker	TRUE	FALSE	FALSE	FALSE	TRUE	TRUE	TRUE	TRUE	Agree	Agree	Agree	Agree	Strongly agree	Disagree	No			I don’t believe I need them	Yes	Yes
Yes	More than 30 years	Female	Postgraduate	West	Married	From 10000 to 20000 SR	Non- healthcare worker	TRUE	FALSE	FALSE	FALSE	FALSE	FALSE	TRUE	TRUE	Agree	Agree	Agree	Neutral	Neutral	Strongly disagree	No			I don’t believe I need them	Yes	Yes
Yes	More than 30 years	Female	Postgraduate	Center	Married	More than 20000 SR	Non- healthcare worker	TRUE	FALSE	FALSE	TRUE	FALSE	FALSE	TRUE	TRUE	Strongly agree	Strongly agree	Strongly agree	Agree	Agree	Neutral	Yes	Natural sources	Don't know
Yes	More than 30 years	Female	Postgraduate	West	Unmarried	From 10000 to 20000 SR	Non- healthcare worker	TRUE	FALSE	FALSE	FALSE	FALSE	FALSE	TRUE	TRUE	Agree	Strongly agree	Strongly agree	Agree	Strongly agree	Neutral	Yes	Natural sources	Don't know
Yes	More than 30 years	Female	Postgraduate	South	Married	More than 20000 SR	Non- healthcare worker	TRUE	FALSE	FALSE	TRUE	FALSE	TRUE	TRUE	TRUE	Strongly agree	Strongly agree	Strongly agree	Strongly agree	Strongly agree	Neutral	Yes	I have no preference (both can be used)	Yes
Yes	More than 30 years	Female	Postgraduate	Center	Married	More than 20000 SR	Non- healthcare worker	TRUE	FALSE	FALSE	FALSE	TRUE	FALSE	TRUE	TRUE	Strongly agree	Strongly agree	Strongly agree	Strongly agree	Agree	Neutral	Yes	Natural sources	Yes
Yes	More than 30 years	Female	Postgraduate	West	Married	Less than 10000 SR	Non- healthcare worker	FALSE	FALSE	FALSE	FALSE	TRUE	TRUE	TRUE	TRUE	Agree	Agree	Strongly agree	Disagree	Agree	Disagree	Yes	Natural sources	Don't know
Yes	More than 30 years	Female	Postgraduate	West	Unmarried	Less than 10000 SR	Non- healthcare worker	TRUE	FALSE	FALSE	TRUE	FALSE	TRUE	TRUE	TRUE	Disagree	Strongly agree	Agree	Strongly agree	Agree	Neutral	Yes	Natural sources	No
Yes	30 years or less	Female	Diploma or Bachelor	Center	Unmarried	Less than 10000 SR	Non- healthcare worker	TRUE	FALSE	FALSE	FALSE	FALSE	TRUE	TRUE	TRUE	Neutral	Agree	Strongly agree	Strongly disagree	Strongly agree	Disagree	Yes	I have no preference (both can be used)	Yes
Yes	30 years or less	Female	Diploma or Bachelor	Center	Unmarried	Less than 10000 SR	Non- healthcare worker	TRUE	FALSE	TRUE	FALSE	TRUE	FALSE	FALSE	FALSE	Neutral	Strongly agree	Strongly disagree	Neutral	Disagree	Neutral	No			I don`t know much about their benefits/uses	No	Yes
Yes	More than 30 years	Female	Postgraduate	East	Married	From 10000 to 20000 SR	Non- healthcare worker	TRUE	FALSE	FALSE	FALSE	TRUE	TRUE	TRUE	TRUE	Agree	Agree	Agree	Agree	Agree	Disagree	No			I don`t know much about their benefits/uses	Yes	Yes
Yes	More than 30 years	Female	Diploma or Bachelor	East	Married	From 10000 to 20000 SR	Non- healthcare worker	FALSE	FALSE	FALSE	FALSE	TRUE	FALSE	TRUE	TRUE	Neutral	Agree	Agree	Agree	Strongly agree	Neutral	No			I don`t know much about their benefits/uses	Yes	Yes
Yes	More than 30 years	Female	Diploma or Bachelor	East	Married	Less than 10000 SR	Non- healthcare worker	TRUE	FALSE	TRUE	TRUE	FALSE	TRUE	TRUE	TRUE	Strongly agree	Strongly agree	Strongly agree	Strongly agree	Strongly agree	Strongly agree	Yes	Natural sources	Yes
Yes	More than 30 years	Female	Diploma or Bachelor	East	Married	From 10000 to 20000 SR	Non- healthcare worker	TRUE	FALSE	FALSE	TRUE	TRUE	TRUE	TRUE	FALSE	Agree	Strongly agree	Strongly agree	Strongly agree	Agree	Neutral	No			I don`t know much about their benefits/uses	Yes	Yes
Yes	30 years or less	Male	High school or less	Center	Unmarried	Less than 10000 SR	Non- healthcare worker	TRUE	TRUE	FALSE	TRUE	TRUE	FALSE	TRUE	TRUE	Agree	Strongly agree	Neutral	Strongly agree	Strongly agree	Strongly disagree	Yes	Natural sources	Yes
Yes	More than 30 years	Male	Postgraduate	Center	Married	More than 20000 SR	Non- healthcare worker	FALSE	FALSE	FALSE	FALSE	FALSE	TRUE	TRUE	FALSE	Agree	Agree	Agree	Agree	Agree	Agree	Yes	Natural sources	Yes
Yes	More than 30 years	Female	Diploma or Bachelor	Center	Married	From 10000 to 20000 SR	Non- healthcare worker	FALSE	FALSE	FALSE	FALSE	FALSE	FALSE	TRUE	FALSE	Agree	Strongly agree	Strongly agree	Strongly agree	Strongly agree	Disagree	Yes	Natural sources	Yes
Yes	30 years or less	Female	Diploma or Bachelor	Center	Unmarried	Less than 10000 SR	Non- healthcare worker	TRUE	FALSE	FALSE	TRUE	TRUE	TRUE	TRUE	TRUE	Disagree	Strongly agree	Agree	Agree	Agree	Agree	Yes	Pharmaceutical preparations\ dietary supplements	Yes
Yes	More than 30 years	Female	Diploma or Bachelor	Center	Married	From 10000 to 20000 SR	Healthcare worker	FALSE	FALSE	FALSE	TRUE	FALSE	TRUE	TRUE	TRUE	Agree	Agree	Agree	Disagree	Disagree	Disagree	Yes	Pharmaceutical preparations\ dietary supplements	Yes
Yes	30 years or less	Male	High school or less	Center	Unmarried	Less than 10000 SR	Non- healthcare worker	TRUE	TRUE	FALSE	TRUE	TRUE	TRUE	TRUE	TRUE	Neutral	Strongly agree	Agree	Agree	Agree	Agree	Yes	Natural sources	Yes
Yes	30 years or less	Male	Diploma or Bachelor	West	Unmarried	Less than 10000 SR	Non- healthcare worker	TRUE	TRUE	FALSE	TRUE	FALSE	TRUE	TRUE	TRUE	Agree	Agree	Agree	Agree	Strongly agree	Neutral	Yes	Natural sources	Yes
Yes	30 years or less	Female	Diploma or Bachelor	Center	Unmarried	Less than 10000 SR	Non- healthcare worker	TRUE	TRUE	FALSE	FALSE	TRUE	TRUE	TRUE	FALSE	Neutral	Agree	Agree	Agree	Strongly disagree	Agree	Yes	Natural sources	Yes
Yes	More than 30 years	Female	Diploma or Bachelor	East	Married	From 10000 to 20000 SR	Non- healthcare worker	TRUE	TRUE	FALSE	TRUE	TRUE	FALSE	TRUE	TRUE	Disagree	Disagree	Agree	Agree	Agree	Agree	No			Possible side-effect	Yes	Yes
Yes	More than 30 years	Female	Diploma or Bachelor	East	Married	From 10000 to 20000 SR	Non- healthcare worker	TRUE	TRUE	FALSE	FALSE	TRUE	TRUE	TRUE	FALSE	Neutral	Neutral	Neutral	Neutral	Neutral	Neutral	No			I don`t know much about their benefits/uses	Don't know	Yes
Yes	More than 30 years	Female	Diploma or Bachelor	Center	Married	Less than 10000 SR	Non- healthcare worker	FALSE	FALSE	FALSE	FALSE	FALSE	FALSE	TRUE	TRUE	Agree	Strongly agree	Strongly agree	Strongly agree	Agree	Disagree	Yes	Natural sources	Yes
Yes	More than 30 years	Female	Diploma or Bachelor	Center	Unmarried	Less than 10000 SR	Non- healthcare worker	FALSE	FALSE	FALSE	TRUE	FALSE	TRUE	TRUE	TRUE	Agree	Agree	Strongly agree	Disagree	Disagree	Agree	Yes	Natural sources	Yes
Yes	More than 30 years	Female	Diploma or Bachelor	West	Unmarried	From 10000 to 20000 SR	Non- healthcare worker	TRUE	TRUE	TRUE	FALSE	TRUE	FALSE	TRUE	FALSE	Neutral	Neutral	Neutral	Neutral	Neutral	Neutral	No			I don`t know much about their benefits/uses	Don't know	Don't know
Yes	30 years or less	Female	Diploma or Bachelor	Center	Unmarried	Less than 10000 SR	Non- healthcare worker	TRUE	FALSE	FALSE	TRUE	TRUE	TRUE	TRUE	FALSE	Strongly disagree	Strongly disagree	Strongly agree	Agree	Strongly agree	Agree	Yes	Pharmaceutical preparations\ dietary supplements	Yes
Yes	More than 30 years	Female	Diploma or Bachelor	West	Married	From 10000 to 20000 SR	Non- healthcare worker	TRUE	TRUE	TRUE	TRUE	TRUE	TRUE	TRUE	TRUE	Neutral	Neutral	Agree	Neutral	Agree	Agree	Yes	Pharmaceutical preparations\ dietary supplements	Don't know
Yes	More than 30 years	Female	Postgraduate	West	Married	More than 20000 SR	Non- healthcare worker	TRUE	FALSE	FALSE	TRUE	TRUE	FALSE	TRUE	TRUE	Strongly agree	Agree	Strongly agree	Agree	Agree	Neutral	Yes	Natural sources	Yes
Yes	30 years or less	Female	High school or less	Center	Unmarried	Less than 10000 SR	Non- healthcare worker	TRUE	FALSE	TRUE	TRUE	TRUE	TRUE	TRUE	TRUE	Neutral	Neutral	Disagree	Agree	Strongly agree	Neutral	No			Possible side-effect	Yes	Yes
Yes	More than 30 years	Male	Diploma or Bachelor	Center	Unmarried	More than 20000 SR	Non- healthcare worker	TRUE	TRUE	TRUE	TRUE	TRUE	TRUE	TRUE	FALSE	Agree	Agree	Agree	Agree	Agree	Agree	No			Possible side-effect	Don't know	Don't know
Yes	More than 30 years	Female	Diploma or Bachelor	North	Married	Less than 10000 SR	Non- healthcare worker	TRUE	TRUE	TRUE	TRUE	TRUE	TRUE	TRUE	FALSE	Agree	Agree	Agree	Agree	Agree	Agree	No			I don`t know much about their benefits/uses	Don't know	Yes
Yes	More than 30 years	Female	Diploma or Bachelor	East	Married	From 10000 to 20000 SR	Non- healthcare worker	TRUE	TRUE	FALSE	TRUE	TRUE	TRUE	TRUE	TRUE	Agree	Agree	Agree	Agree	Agree	Strongly agree	Yes	Natural sources	Yes
Yes	More than 30 years	Female	Diploma or Bachelor	Center	Married	From 10000 to 20000 SR	Non- healthcare worker	TRUE	FALSE	FALSE	TRUE	TRUE	TRUE	TRUE	TRUE	Agree	Agree	Agree	Neutral	Agree	Neutral	Yes	Pharmaceutical preparations\ dietary supplements	Yes
Yes	More than 30 years	Female	Diploma or Bachelor	Center	Married	From 10000 to 20000 SR	Non- healthcare worker	TRUE	FALSE	TRUE	TRUE	FALSE	TRUE	TRUE	TRUE	Strongly agree	Neutral	Agree	Neutral	Agree	Neutral	No			I don`t know much about their benefits/uses	Yes	Yes
Yes	More than 30 years	Female	Diploma or Bachelor	Center	Married	Less than 10000 SR	Non- healthcare worker	TRUE	TRUE	TRUE	FALSE	TRUE	TRUE	TRUE	FALSE	Neutral	Agree	Agree	Agree	Agree	Agree	Yes	Natural sources	Don't know
Yes	More than 30 years	Female	Diploma or Bachelor	Center	Married	More than 20000 SR	Non- healthcare worker	TRUE	FALSE	FALSE	TRUE	TRUE	TRUE	TRUE	FALSE	Neutral	Agree	Agree	Neutral	Strongly agree	Strongly disagree	Yes	Natural sources	Yes
Yes	More than 30 years	Female	High school or less	North	Married	Less than 10000 SR	Non- healthcare worker	FALSE	TRUE	TRUE	TRUE	TRUE	TRUE	TRUE	TRUE	Agree	Strongly agree	Neutral	Agree	Strongly agree	Strongly agree	Yes	I have no preference (both can be used)	Don't know
Yes	More than 30 years	Female	Diploma or Bachelor	Center	Married	From 10000 to 20000 SR	Non- healthcare worker	TRUE	TRUE	TRUE	TRUE	TRUE	TRUE	TRUE	TRUE	Strongly agree	Strongly agree	Strongly agree	Strongly agree	Strongly agree	Strongly agree	No			I don`t know much about their benefits/uses	Yes	Yes
Yes	More than 30 years	Female	Diploma or Bachelor	Center	Married	From 10000 to 20000 SR	Non- healthcare worker	TRUE	FALSE	FALSE	TRUE	TRUE	TRUE	TRUE	TRUE	Agree	Strongly agree	Neutral	Agree	Neutral	Disagree	Yes	Natural sources	Yes
Yes	More than 30 years	Female	Diploma or Bachelor	Center	Married	From 10000 to 20000 SR	Non- healthcare worker	TRUE	TRUE	TRUE	TRUE	TRUE	TRUE	TRUE	TRUE	Agree	Agree	Agree	Agree	Agree	Agree	Yes	Natural sources	Yes
Yes	More than 30 years	Female	Diploma or Bachelor	Center	Married	Less than 10000 SR	Non- healthcare worker	TRUE	FALSE	FALSE	TRUE	TRUE	TRUE	TRUE	TRUE	Neutral	Agree	Agree	Agree	Agree	Disagree	No			I don`t know much about their benefits/uses	Don't know	Yes
Yes	More than 30 years	Female	Diploma or Bachelor	Center	Married	From 10000 to 20000 SR	Non- healthcare worker	TRUE	TRUE	TRUE	TRUE	TRUE	TRUE	TRUE	TRUE	Strongly agree	Strongly agree	Strongly agree	Strongly agree	Agree	Agree	Yes	Pharmaceutical preparations\ dietary supplements	Yes
Yes	More than 30 years	Female	Postgraduate	Center	Married	More than 20000 SR	Non- healthcare worker	TRUE	FALSE	FALSE	FALSE	TRUE	TRUE	TRUE	TRUE	Disagree	Neutral	Agree	Agree	Agree	Neutral	Yes	Natural sources	Yes
Yes	More than 30 years	Female	Postgraduate	Center	Married	More than 20000 SR	Non- healthcare worker	TRUE	FALSE	FALSE	FALSE	FALSE	FALSE	TRUE	TRUE	Neutral	Neutral	Neutral	Neutral	Neutral	Strongly agree	Yes	Pharmaceutical preparations\ dietary supplements	Yes
Yes	30 years or less	Male	Diploma or Bachelor	North	Unmarried	Less than 10000 SR	Non- healthcare worker	TRUE	FALSE	TRUE	TRUE	FALSE	TRUE	TRUE	FALSE	Neutral	Agree	Agree	Agree	Agree	Agree	Yes	Natural sources	Yes
Yes	30 years or less	Male	Diploma or Bachelor	East	Unmarried	Less than 10000 SR	Non- healthcare worker	TRUE	TRUE	FALSE	FALSE	TRUE	TRUE	TRUE	FALSE	Neutral	Neutral	Neutral	Neutral	Neutral	Neutral	No			I don’t believe I need them	Don't know	Don't know
Yes	More than 30 years	Male	Diploma or Bachelor	Center	Married	From 10000 to 20000 SR	Non- healthcare worker	TRUE	FALSE	FALSE	TRUE	TRUE	FALSE	TRUE	TRUE	Strongly disagree	Strongly agree	Strongly agree	Agree	Strongly agree	Agree	Yes	Natural sources	Yes
Yes	30 years or less	Female	Diploma or Bachelor	Center	Unmarried	Less than 10000 SR	Healthcare worker	TRUE	FALSE	TRUE	TRUE	TRUE	TRUE	TRUE	TRUE	Neutral	Agree	Agree	Agree	Strongly agree	Agree	No			I don`t know much about their benefits/uses	Yes	Yes
Yes	30 years or less	Female	Diploma or Bachelor	Center	Unmarried	Less than 10000 SR	Healthcare worker	TRUE	TRUE	TRUE	TRUE	FALSE	TRUE	TRUE	TRUE	Disagree	Strongly agree	Agree	Strongly agree	Strongly agree	Strongly agree	No			I don`t know much about their benefits/uses	Yes	Yes
Yes	30 years or less	Female	Diploma or Bachelor	Center	Unmarried	Less than 10000 SR	Healthcare worker	TRUE	TRUE	TRUE	TRUE	FALSE	TRUE	TRUE	TRUE	Strongly agree	Strongly agree	Strongly agree	Strongly agree	Strongly agree	Strongly agree	Yes	Natural sources	Yes
Yes	30 years or less	Female	Diploma or Bachelor	Center	Unmarried	Less than 10000 SR	Healthcare worker	TRUE	TRUE	TRUE	TRUE	TRUE	TRUE	TRUE	TRUE	Strongly agree	Strongly agree	Strongly agree	Strongly agree	Strongly agree	Strongly agree	Yes	Natural sources	Yes
Yes	More than 30 years	Female	Diploma or Bachelor	Center	Married	Less than 10000 SR	Non- healthcare worker	TRUE	TRUE	FALSE	TRUE	FALSE	FALSE	TRUE	FALSE	Agree	Neutral	Neutral	Neutral	Neutral	Neutral	Yes	Pharmaceutical preparations\ dietary supplements	Yes
Yes	More than 30 years	Female	Diploma or Bachelor	Center	Married	Less than 10000 SR	Non- healthcare worker	TRUE	FALSE	FALSE	TRUE	TRUE	TRUE	TRUE	TRUE	Agree	Agree	Agree	Agree	Agree	Agree	No		Yes	I don`t know much about their benefits/uses	Yes	Yes
Yes	More than 30 years	Female	Postgraduate	Center	Married	More than 20000 SR	Non- healthcare worker	FALSE	FALSE	FALSE	FALSE	TRUE	FALSE	TRUE	TRUE	Disagree	Strongly agree	Strongly agree	Agree	Agree	Disagree	Yes	Natural sources	Yes
Yes	30 years or less	Female	High school or less	Center	Unmarried	Less than 10000 SR	Non- healthcare worker	TRUE	TRUE	FALSE	FALSE	TRUE	TRUE	TRUE	FALSE	Disagree	Agree	Agree	Agree	Agree	Neutral	No			Possible side-effect	Yes	Yes
Yes	30 years or less	Female	High school or less	Center	Unmarried	Less than 10000 SR	Non- healthcare worker	FALSE	FALSE	FALSE	FALSE	FALSE	TRUE	TRUE	FALSE	Neutral	Agree	Neutral	Neutral	Strongly agree	Neutral	No			I don`t know much about their benefits/uses	Don't know	Yes
Yes	30 years or less	Female	High school or less	Center	Unmarried	Less than 10000 SR	Non- healthcare worker	TRUE	FALSE	TRUE	TRUE	TRUE	TRUE	TRUE	TRUE	Neutral	Agree	Agree	Agree	Agree	Agree	No			I don`t know much about their benefits/uses	Yes	Yes
Yes	30 years or less	Female	Diploma or Bachelor	Center	Unmarried	Less than 10000 SR	Non- healthcare worker	FALSE	FALSE	FALSE	FALSE	TRUE	TRUE	TRUE	TRUE	Agree	Agree	Strongly agree	Agree	Agree	Neutral	No			Cost	Yes	Yes
Yes	30 years or less	Female	High school or less	Center	Unmarried	Less than 10000 SR	Non- healthcare worker	TRUE	FALSE	FALSE	FALSE	TRUE	TRUE	TRUE	TRUE	Neutral	Agree	Agree	Agree	Agree	Agree	No			Possible side-effect	Yes	Yes
Yes	30 years or less	Female	High school or less	Center	Unmarried	Less than 10000 SR	Non- healthcare worker	TRUE	TRUE	TRUE	TRUE	TRUE	FALSE	FALSE	FALSE	Neutral	Agree	Neutral	Neutral	Agree	Agree	Yes	Natural sources	Yes
Yes	30 years or less	Male	High school or less	Center	Unmarried	Less than 10000 SR	Non- healthcare worker	TRUE	TRUE	TRUE	FALSE	FALSE	TRUE	TRUE	FALSE	Neutral	Disagree	Strongly disagree	Neutral	Strongly disagree	Neutral	No			I don`t know much about their benefits/uses	Yes	Yes
Yes	More than 30 years	Female	Postgraduate	Center	Married	More than 20000 SR	Non- healthcare worker	TRUE	FALSE	FALSE	FALSE	TRUE	TRUE	TRUE	TRUE	Agree	Strongly agree	Strongly agree	Strongly agree	Strongly agree	Disagree	Yes	Natural sources	Don't know
Yes	More than 30 years	Female	Diploma or Bachelor	Center	Married	From 10000 to 20000 SR	Non- healthcare worker	FALSE	TRUE	FALSE	FALSE	FALSE	TRUE	TRUE	TRUE	Neutral	Agree	Agree	Disagree	Agree	Neutral	No			Possible side-effect	Don't know	Yes
Yes	More than 30 years	Female	Postgraduate	Center	Married	From 10000 to 20000 SR	Non- healthcare worker	TRUE	TRUE	TRUE	TRUE	TRUE	FALSE	TRUE	TRUE	Neutral	Neutral	Neutral	Neutral	Neutral	Neutral	Yes	Natural sources	Yes
Yes	More than 30 years	Female	Diploma or Bachelor	Center	Married	From 10000 to 20000 SR	Non- healthcare worker	TRUE	TRUE	FALSE	TRUE	FALSE	TRUE	TRUE	TRUE	Agree	Agree	Agree	Neutral	Neutral	Neutral	No			Possible side-effect	Don't know	Yes
Yes	More than 30 years	Female	Diploma or Bachelor	Center	Married	Less than 10000 SR	Non- healthcare worker	TRUE	TRUE	FALSE	TRUE	FALSE	TRUE	TRUE	TRUE	Neutral	Agree	Agree	Agree	Agree	Agree	No		Don't know	I don`t know much about their benefits/uses	Don't know	Yes
Yes	More than 30 years	Female	Postgraduate	Center	Married	Less than 10000 SR	Non- healthcare worker	TRUE	FALSE	FALSE	TRUE	TRUE	FALSE	TRUE	TRUE	Agree	Strongly agree	Strongly agree	Neutral	Agree	Agree	Yes	Pharmaceutical preparations\ dietary supplements	Yes
Yes	More than 30 years	Female	Postgraduate	North	Unmarried	Less than 10000 SR	Non- healthcare worker	FALSE	FALSE	FALSE	FALSE	FALSE	FALSE	TRUE	TRUE	Agree	Agree	Strongly agree	Agree	Agree	Neutral	Yes	Natural sources	Yes
Yes	More than 30 years	Female	Diploma or Bachelor	Center	Married	Less than 10000 SR	Non- healthcare worker	TRUE	FALSE	FALSE	FALSE	TRUE	TRUE	TRUE	TRUE	Neutral	Agree	Agree	Agree	Strongly agree	Neutral	Yes	Natural sources	Yes
Yes	30 years or less	Female	Diploma or Bachelor	Center	Married	Less than 10000 SR	Non- healthcare worker	TRUE	FALSE	FALSE	TRUE	TRUE	FALSE	TRUE	TRUE	Agree	Agree	Agree	Agree	Strongly agree	Neutral	Yes	Pharmaceutical preparations\ dietary supplements	Yes
Yes	30 years or less	Female	Diploma or Bachelor	West	Married	Less than 10000 SR	Non- healthcare worker	TRUE	FALSE	TRUE	TRUE	TRUE	FALSE	TRUE	TRUE	Agree	Neutral	Agree	Neutral	Neutral	Agree	Yes	Pharmaceutical preparations\ dietary supplements	Don't know
Yes	30 years or less	Female	Diploma or Bachelor	West	Married	Less than 10000 SR	Non- healthcare worker	TRUE	FALSE	FALSE	FALSE	FALSE	TRUE	TRUE	TRUE	Neutral	Disagree	Neutral	Agree	Agree	Disagree	No			I don’t believe I need them	Yes	Yes
Yes	More than 30 years	Female	Postgraduate	South	Unmarried	From 10000 to 20000 SR	Healthcare worker	TRUE	FALSE	TRUE	FALSE	TRUE	TRUE	TRUE	TRUE	Neutral	Neutral	Agree	Agree	Agree	Neutral	Yes	Natural sources	Yes
Yes	More than 30 years	Male	Postgraduate	Center	Married	From 10000 to 20000 SR	Non- healthcare worker	TRUE	FALSE	FALSE	FALSE	FALSE	FALSE	TRUE	TRUE	Neutral	Agree	Agree	Agree	Agree	Neutral	No			Possible side-effect	Yes	Yes
Yes	More than 30 years	Female	Diploma or Bachelor	South	Married	Less than 10000 SR	Non- healthcare worker	TRUE	TRUE	TRUE	FALSE	FALSE	TRUE	FALSE	TRUE	Neutral	Disagree	Disagree	Disagree	Neutral	Neutral	Yes	I have no preference (both can be used)	Don't know
Yes	More than 30 years	Male	Postgraduate	Center	Married	From 10000 to 20000 SR	Non- healthcare worker	FALSE	FALSE	FALSE	FALSE	TRUE	FALSE	TRUE	TRUE	Neutral	Agree	Agree	Agree	Strongly agree	Agree	Yes	Natural sources	Yes
Yes	More than 30 years	Female	Diploma or Bachelor	North	Married	From 10000 to 20000 SR	Non- healthcare worker	FALSE	FALSE	TRUE	FALSE	FALSE	TRUE	TRUE	TRUE	Strongly disagree	Neutral	Strongly disagree	Disagree	Strongly agree	Agree	No			I don`t know much about their benefits/uses	Don't know	Yes
Yes	More than 30 years	Female	Diploma or Bachelor	West	Married	Less than 10000 SR	Non- healthcare worker	FALSE	FALSE	FALSE	TRUE	TRUE	FALSE	TRUE	TRUE	Disagree	Strongly agree	Agree	Strongly agree	Strongly agree	Strongly agree	No			I don’t believe I need them	Yes	Yes
Yes	More than 30 years	Female	Postgraduate	West	Unmarried	Less than 10000 SR	Non- healthcare worker	TRUE	FALSE	FALSE	TRUE	TRUE	TRUE	TRUE	TRUE	Strongly agree	Strongly agree	Strongly agree	Agree	Strongly agree	Neutral	Yes	I have no preference (both can be used)	Yes
Yes	30 years or less	Female	High school or less	Center	Unmarried	Less than 10000 SR	Non- healthcare worker	TRUE	FALSE	TRUE	TRUE	TRUE	FALSE	TRUE	TRUE	Neutral	Neutral	Agree	Agree	Agree	Neutral	No			I don`t know much about their benefits/uses	Don't know	Yes
Yes	30 years or less	Male	Postgraduate	West	Unmarried	Less than 10000 SR	Non- healthcare worker	FALSE	FALSE	FALSE	TRUE	TRUE	FALSE	TRUE	TRUE	Neutral	Neutral	Agree	Neutral	Strongly agree	Neutral	No			I don`t know much about their benefits/uses	Yes	Yes
Yes	More than 30 years	Female	Diploma or Bachelor	Center	Married	From 10000 to 20000 SR	Non- healthcare worker	FALSE	FALSE	FALSE	FALSE	FALSE	FALSE	TRUE	TRUE	Strongly agree	Strongly agree	Strongly agree	Agree	Strongly agree	Disagree	Yes	Natural sources	Yes
Yes	More than 30 years	Male	Diploma or Bachelor	Center	Married	Less than 10000 SR	Non- healthcare worker	TRUE	FALSE	TRUE	FALSE	TRUE	TRUE	TRUE	TRUE	Agree	Agree	Agree	Strongly agree	Strongly agree	Agree	Yes	Natural sources	Yes
Yes	More than 30 years	Female	Diploma or Bachelor	East	Married	Less than 10000 SR	Non- healthcare worker	TRUE	TRUE	FALSE	TRUE	TRUE	TRUE	TRUE	TRUE	Neutral	Agree	Agree	Agree	Agree	Disagree	Yes	Natural sources	Yes
Yes	More than 30 years	Female	High school or less	East	Married	Less than 10000 SR	Non- healthcare worker	TRUE	TRUE	FALSE	TRUE	FALSE	FALSE	TRUE	TRUE	Neutral	Neutral	Neutral	Neutral	Neutral	Neutral	No			I don`t know much about their benefits/uses	Don't know	Don't know
Yes	More than 30 years	Female	Diploma or Bachelor	East	Married	From 10000 to 20000 SR	Healthcare worker	FALSE	FALSE	FALSE	FALSE	FALSE	FALSE	TRUE	TRUE	Agree	Strongly agree	Agree	Agree	Agree	Strongly disagree	Yes	Natural sources	Yes
Yes	More than 30 years	Female	High school or less	East	Married	Less than 10000 SR	Non- healthcare worker	TRUE	TRUE	TRUE	TRUE	TRUE	TRUE	TRUE	TRUE	Strongly agree	Neutral	Strongly agree	Strongly agree	Strongly agree	Agree	Yes	Pharmaceutical preparations\ dietary supplements	Yes
Yes	More than 30 years	Female	Postgraduate	Center	Married	More than 20000 SR	Healthcare worker	TRUE	FALSE	FALSE	FALSE	TRUE	TRUE	TRUE	TRUE	Strongly agree	Strongly agree	Strongly agree	Neutral	Neutral	Strongly agree	Yes	I have no preference (both can be used)	Yes
Yes	More than 30 years	Female	Postgraduate	Center	Married	More than 20000 SR	Healthcare worker	TRUE	FALSE	FALSE	FALSE	TRUE	FALSE	TRUE	TRUE	Strongly agree	Strongly agree	Strongly agree	Agree	Agree	Strongly agree	No			I don’t believe I need them	Yes	Yes
Yes	More than 30 years	Male	Diploma or Bachelor	Center	Married	From 10000 to 20000 SR	Healthcare worker	TRUE	FALSE	FALSE	TRUE	TRUE	TRUE	TRUE	TRUE	Agree	Strongly agree	Strongly agree	Agree	Strongly agree	Neutral	Yes	Natural sources	Yes
Yes	More than 30 years	Female	Postgraduate	Center	Married	More than 20000 SR	Healthcare worker	TRUE	FALSE	TRUE	TRUE	TRUE	FALSE	TRUE	TRUE	Strongly agree	Neutral	Strongly agree	Agree	Agree	Neutral	Yes	Natural sources	Yes
Yes	30 years or less	Female	Diploma or Bachelor	North	Unmarried	Less than 10000 SR	Healthcare worker	TRUE	FALSE	TRUE	TRUE	TRUE	TRUE	TRUE	TRUE	Agree	Neutral	Agree	Agree	Strongly agree	Agree	Yes	I have no preference (both can be used)	Yes
Yes	30 years or less	Female	Diploma or Bachelor	West	Unmarried	Less than 10000 SR	Healthcare worker	TRUE	FALSE	TRUE	TRUE	TRUE	FALSE	TRUE	FALSE	Disagree	Neutral	Neutral	Agree	Agree	Disagree	No			I don`t know much about their benefits/uses	Yes	Yes
Yes	More than 30 years	Male	Diploma or Bachelor	Center	Married	Less than 10000 SR	Non- healthcare worker	TRUE	TRUE	TRUE	TRUE	TRUE	TRUE	TRUE	TRUE	Strongly agree	Strongly agree	Strongly agree	Strongly agree	Strongly agree	Strongly agree	Yes	I have no preference (both can be used)	Yes
Yes	More than 30 years	Female	Diploma or Bachelor	Center	Married	From 10000 to 20000 SR	Non- healthcare worker	TRUE	FALSE	FALSE	FALSE	FALSE	TRUE	TRUE	TRUE	Neutral	Strongly agree	Strongly agree	Strongly agree	Strongly agree	Disagree	Yes	Pharmaceutical preparations\ dietary supplements	Don't know
Yes	More than 30 years	Female	Diploma or Bachelor	Center	Married	Less than 10000 SR	Non- healthcare worker	TRUE	FALSE	FALSE	TRUE	TRUE	TRUE	TRUE	TRUE	Agree	Neutral	Agree	Agree	Strongly agree	Neutral	Yes	I have no preference (both can be used)	No
Yes	More than 30 years	Male	Postgraduate	Center	Married	From 10000 to 20000 SR	Non- healthcare worker	TRUE	TRUE	TRUE	TRUE	FALSE	FALSE	FALSE	FALSE	Neutral	Neutral	Neutral	Neutral	Strongly agree	Neutral	No			I don`t know much about their benefits/uses	No	No
Yes	30 years or less	Female	Diploma or Bachelor	Center	Unmarried	Less than 10000 SR	Non- healthcare worker	FALSE	TRUE	FALSE	TRUE	TRUE	TRUE	TRUE	TRUE	Neutral	Neutral	Neutral	Neutral	Neutral	Neutral	No			I don`t know much about their benefits/uses	Don't know	Don't know
Yes	More than 30 years	Female	Diploma or Bachelor	Center	Married	From 10000 to 20000 SR	Non- healthcare worker	TRUE	TRUE	TRUE	TRUE	TRUE	TRUE	TRUE	FALSE	Neutral	Agree	Neutral	Neutral	Strongly agree	Neutral	No			I don`t know much about their benefits/uses	Don't know	Yes
Yes	30 years or less	Female	High school or less	Center	Unmarried	Less than 10000 SR	Non- healthcare worker	TRUE	FALSE	FALSE	FALSE	TRUE	TRUE	TRUE	TRUE	Agree	Agree	Strongly agree	Strongly agree	Strongly agree	Strongly agree	Yes	Natural sources	Yes
Yes	30 years or less	Female	Diploma or Bachelor	Center	Unmarried	Less than 10000 SR	Non- healthcare worker	FALSE	FALSE	FALSE	TRUE	TRUE	TRUE	TRUE	TRUE	Strongly agree	Strongly agree	Strongly disagree	Neutral	Agree	Neutral	Yes	Natural sources	Yes
Yes	More than 30 years	Female	High school or less	Center	Married	Less than 10000 SR	Non- healthcare worker	TRUE	TRUE	TRUE	TRUE	TRUE	TRUE	TRUE	TRUE	Strongly agree	Strongly agree	Strongly agree	Strongly agree	Strongly agree	Strongly agree	Yes	Natural sources	Yes
Yes	More than 30 years	Male	Postgraduate	Center	Married	More than 20000 SR	Healthcare worker	FALSE	FALSE	FALSE	FALSE	FALSE	TRUE	TRUE	TRUE	Strongly agree	Strongly agree	Strongly agree	Neutral	Agree	Neutral	Yes	Natural sources	Yes
Yes	30 years or less	Female	Diploma or Bachelor	Center	Unmarried	Less than 10000 SR	Non- healthcare worker	TRUE	FALSE	TRUE	FALSE	TRUE	TRUE	TRUE	FALSE	Neutral	Neutral	Agree	Neutral	Neutral	Neutral	No			I don’t believe I need them	No	No
Yes	More than 30 years	Female	Diploma or Bachelor	West	Unmarried	From 10000 to 20000 SR	Healthcare worker	TRUE	FALSE	FALSE	TRUE	TRUE	TRUE	TRUE	TRUE	Neutral	Agree	Strongly agree	Neutral	Strongly agree	Neutral	No			I don`t know much about their benefits/uses	Yes	Yes
Yes	More than 30 years	Male	Diploma or Bachelor	West	Married	From 10000 to 20000 SR	Non- healthcare worker	FALSE	TRUE	FALSE	TRUE	TRUE	TRUE	TRUE	FALSE	Neutral	Agree	Agree	Neutral	Strongly agree	Agree	No			I don`t know much about their benefits/uses	Don't know	Yes
Yes	More than 30 years	Female	High school or less	West	Married	From 10000 to 20000 SR	Non- healthcare worker	TRUE	FALSE	TRUE	TRUE	TRUE	TRUE	TRUE	TRUE	Neutral	Agree	Strongly agree	Agree	Strongly agree	Agree	No			I don`t know much about their benefits/uses	Yes	Yes
Yes	More than 30 years	Female	Diploma or Bachelor	Center	Unmarried	More than 20000 SR	Non- healthcare worker	TRUE	TRUE	TRUE	TRUE	TRUE	FALSE	TRUE	FALSE	Strongly disagree	Agree	Strongly agree	Agree	Strongly agree	Strongly disagree	No			I don`t know much about their benefits/uses	Yes	Yes
Yes	More than 30 years	Male	Diploma or Bachelor	West	Married	From 10000 to 20000 SR	Non- healthcare worker	FALSE	FALSE	FALSE	FALSE	FALSE	TRUE	TRUE	FALSE	Strongly agree	Strongly agree	Strongly agree	Strongly agree	Strongly agree	Neutral	Yes	I have no preference (both can be used)	Yes
Yes	More than 30 years	Female	Diploma or Bachelor	North	Married	Less than 10000 SR	Non- healthcare worker	TRUE	FALSE	FALSE	FALSE	TRUE	FALSE	TRUE	TRUE	Disagree	Strongly disagree	Strongly disagree	Neutral	Agree	Neutral	Yes	Natural sources	No
Yes	More than 30 years	Female	Diploma or Bachelor	West	Married	From 10000 to 20000 SR	Non- healthcare worker	FALSE	TRUE	FALSE	TRUE	TRUE	TRUE	TRUE	FALSE	Agree	Neutral	Neutral	Neutral	Agree	Neutral	No			I don’t believe I need them	Yes	Yes
Yes	More than 30 years	Female	Diploma or Bachelor	North	Married	Less than 10000 SR	Non- healthcare worker	TRUE	TRUE	FALSE	TRUE	FALSE	FALSE	TRUE	TRUE	Agree	Strongly agree	Agree	Disagree	Disagree	Disagree	Yes	Natural sources	Yes
Yes	More than 30 years	Female	Diploma or Bachelor	North	Married	From 10000 to 20000 SR	Non- healthcare worker	TRUE	TRUE	TRUE	TRUE	TRUE	TRUE	TRUE	TRUE	Agree	Agree	Agree	Agree	Agree	Agree	Yes	Natural sources	Yes
Yes	More than 30 years	Male	Diploma or Bachelor	West	Married	More than 20000 SR	Non- healthcare worker	TRUE	FALSE	FALSE	FALSE	FALSE	TRUE	TRUE	TRUE	Neutral	Agree	Agree	Agree	Agree	Strongly disagree	Yes	Natural sources	Don't know
Yes	More than 30 years	Female	Diploma or Bachelor	West	Married	Less than 10000 SR	Non- healthcare worker	FALSE	FALSE	FALSE	FALSE	FALSE	FALSE	TRUE	TRUE	Neutral	Agree	Agree	Agree	Agree	Agree	Yes	I have no preference (both can be used)	Yes
Yes	30 years or less	Female	Diploma or Bachelor	West	Unmarried	Less than 10000 SR	Non- healthcare worker	FALSE	FALSE	TRUE	TRUE	TRUE	TRUE	TRUE	TRUE	Agree	Agree	Agree	Agree	Strongly agree	Agree	No			I don`t know much about their benefits/uses	Yes	Yes
Yes	More than 30 years	Female	Diploma or Bachelor	West	Married	From 10000 to 20000 SR	Non- healthcare worker	TRUE	FALSE	FALSE	TRUE	TRUE	FALSE	TRUE	TRUE	Agree	Agree	Agree	Disagree	Strongly agree	Agree	No			I don`t know much about their benefits/uses	Yes	Yes
Yes	More than 30 years	Female	Diploma or Bachelor	Center	Married	Less than 10000 SR	Non- healthcare worker	TRUE	TRUE	TRUE	TRUE	TRUE	TRUE	TRUE	TRUE	Agree	Strongly agree	Strongly agree	Agree	Strongly agree	Agree	No			I don`t know much about their benefits/uses	Yes	Yes
Yes	30 years or less	Female	Diploma or Bachelor	West	Married	Less than 10000 SR	Non- healthcare worker	TRUE	FALSE	TRUE	FALSE	TRUE	TRUE	TRUE	FALSE	Neutral	Disagree	Agree	Agree	Strongly agree	Neutral	No			I don’t believe I need them	Don't know	Yes
Yes	30 years or less	Female	Diploma or Bachelor	West	Married	From 10000 to 20000 SR	Healthcare worker	TRUE	FALSE	FALSE	FALSE	FALSE	TRUE	TRUE	FALSE	Disagree	Agree	Agree	Agree	Strongly agree	Neutral	No			I don`t know much about their benefits/uses	Don't know	Yes
Yes	More than 30 years	Female	Diploma or Bachelor	Center	Married	Less than 10000 SR	Non- healthcare worker	TRUE	FALSE	FALSE	FALSE	TRUE	FALSE	TRUE	TRUE	Agree	Strongly agree	Strongly agree	Agree	Strongly agree	Agree	Yes	Natural sources	Don't know
Yes	More than 30 years	Female	Diploma or Bachelor	West	Unmarried	Less than 10000 SR	Non- healthcare worker	TRUE	FALSE	FALSE	FALSE	TRUE	TRUE	TRUE	FALSE	Neutral	Neutral	Agree	Agree	Strongly agree	Disagree	Yes	Natural sources	Don't know
Yes	More than 30 years	Male	Diploma or Bachelor	Center	Married	More than 20000 SR	Non- healthcare worker	TRUE	TRUE	FALSE	TRUE	TRUE	FALSE	TRUE	TRUE	Strongly agree	Strongly agree	Strongly agree	Strongly agree	Strongly agree	Strongly agree	Yes	Natural sources	Yes
Yes	More than 30 years	Female	Diploma or Bachelor	West	Married	From 10000 to 20000 SR	Healthcare worker	TRUE	FALSE	FALSE	TRUE	TRUE	FALSE	TRUE	FALSE	Neutral	Disagree	Neutral	Neutral	Strongly agree	Neutral	No			I don`t know much about their benefits/uses	Don't know	Yes
Yes	30 years or less	Male	Diploma or Bachelor	Center	Unmarried	Less than 10000 SR	Non- healthcare worker	FALSE	FALSE	TRUE	FALSE	TRUE	TRUE	TRUE	TRUE	Neutral	Neutral	Strongly disagree	Agree	Agree	Agree	Yes	Natural sources	Don't know
Yes	30 years or less	Male	High school or less	Center	Unmarried	Less than 10000 SR	Non- healthcare worker	TRUE	FALSE	TRUE	TRUE	FALSE	TRUE	TRUE	FALSE	Strongly disagree	Strongly disagree	Strongly disagree	Neutral	Strongly agree	Neutral	No			I don’t believe I need them	No	Yes
Yes	30 years or less	Female	Diploma or Bachelor	Center	Unmarried	Less than 10000 SR	Non- healthcare worker	FALSE	FALSE	FALSE	TRUE	TRUE	FALSE	TRUE	FALSE	Disagree	Disagree	Neutral	Neutral	Neutral	Strongly agree	Yes	Natural sources	No
Yes	30 years or less	Female	Diploma or Bachelor	Center	Unmarried	Less than 10000 SR	Healthcare worker	TRUE	FALSE	TRUE	FALSE	FALSE	FALSE	FALSE	FALSE	Disagree	Agree	Neutral	Disagree	Agree	Agree	Yes	Natural sources	Yes
Yes	30 years or less	Female	Diploma or Bachelor	Center	Unmarried	Less than 10000 SR	Non- healthcare worker	TRUE	FALSE	TRUE	FALSE	TRUE	TRUE	TRUE	TRUE	Agree	Agree	Agree	Agree	Agree	Agree	No			I don`t know much about their benefits/uses	Don't know	Yes
Yes	30 years or less	Female	Diploma or Bachelor	Center	Unmarried	Less than 10000 SR	Non- healthcare worker	TRUE	FALSE	FALSE	TRUE	FALSE	TRUE	TRUE	TRUE	Strongly disagree	Strongly agree	Strongly agree	Strongly agree	Strongly agree	Strongly agree	No			I don`t know much about their benefits/uses	Yes	Yes
Yes	More than 30 years	Female	Diploma or Bachelor	Center	Married	From 10000 to 20000 SR	Non- healthcare worker	TRUE	TRUE	FALSE	TRUE	TRUE	TRUE	TRUE	TRUE	Agree	Strongly agree	Agree	Disagree	Strongly agree	Neutral	Yes	Natural sources	Yes
Yes	30 years or less	Female	High school or less	Center	Unmarried	Less than 10000 SR	Non- healthcare worker	TRUE	TRUE	FALSE	TRUE	TRUE	TRUE	TRUE	TRUE	Agree	Agree	Strongly agree	Agree	Agree	Strongly disagree	Yes	Natural sources	Yes
Yes	More than 30 years	Female	Diploma or Bachelor	North	Married	From 10000 to 20000 SR	Non- healthcare worker	TRUE	TRUE	TRUE	TRUE	TRUE	TRUE	TRUE	TRUE	Strongly agree	Strongly agree	Strongly agree	Strongly agree	Strongly agree	Strongly agree	Yes	Natural sources	Don't know
Yes	More than 30 years	Female	Diploma or Bachelor	West	Married	Less than 10000 SR	Non- healthcare worker	TRUE	TRUE	FALSE	TRUE	TRUE	TRUE	TRUE	TRUE	Neutral	Strongly agree	Strongly agree	Strongly agree	Strongly agree	Strongly agree	Yes	Natural sources	Yes
Yes	More than 30 years	Female	Diploma or Bachelor	South	Unmarried	From 10000 to 20000 SR	Non- healthcare worker	TRUE	FALSE	FALSE	TRUE	TRUE	FALSE	FALSE	FALSE	Disagree	Neutral	Strongly disagree	Neutral	Neutral	Neutral	No			I don`t know much about their benefits/uses	Don't know	Don't know
Yes	30 years or less	Female	Diploma or Bachelor	Center	Married	Less than 10000 SR	Non- healthcare worker	TRUE	FALSE	TRUE	TRUE	TRUE	TRUE	TRUE	TRUE	Neutral	Strongly agree	Agree	Agree	Agree	Agree	No			I don’t believe I need them	Don't know	Yes
Yes	30 years or less	Female	High school or less	East	Unmarried	Less than 10000 SR	Non- healthcare worker	TRUE	TRUE	FALSE	TRUE	TRUE	FALSE	TRUE	TRUE	Neutral	Neutral	Agree	Neutral	Agree	Neutral	No			I don’t believe I need them	No	Don't know
Yes	More than 30 years	Female	High school or less	Center	Married	Less than 10000 SR	Non- healthcare worker	TRUE	TRUE	TRUE	TRUE	TRUE	TRUE	TRUE	TRUE	Strongly agree	Strongly agree	Strongly agree	Strongly agree	Strongly agree	Strongly agree	No			I don`t know much about their benefits/uses	Yes	Yes
Yes	30 years or less	Female	Diploma or Bachelor	East	Unmarried	Less than 10000 SR	Non- healthcare worker	TRUE	TRUE	TRUE	FALSE	FALSE	FALSE	FALSE	TRUE	Neutral	Strongly agree	Strongly agree	Neutral	Strongly agree	Agree	No			I don`t know much about their benefits/uses	Yes	Yes
Yes	30 years or less	Female	Diploma or Bachelor	South	Unmarried	Less than 10000 SR	Non- healthcare worker	TRUE	TRUE	FALSE	TRUE	FALSE	TRUE	TRUE	TRUE	Agree	Strongly agree	Strongly agree	Strongly agree	Strongly agree	Neutral	Yes	I have no preference (both can be used)	Don't know
Yes	30 years or less	Female	Diploma or Bachelor	Center	Unmarried	Less than 10000 SR	Non- healthcare worker	TRUE	FALSE	FALSE	FALSE	FALSE	TRUE	TRUE	TRUE	Strongly agree	Strongly agree	Strongly agree	Disagree	Agree	Disagree	Yes	Natural sources	Yes
Yes	30 years or less	Female	Diploma or Bachelor	Center	Unmarried	From 10000 to 20000 SR	Non- healthcare worker	FALSE	FALSE	FALSE	FALSE	TRUE	FALSE	TRUE	TRUE	Agree	Neutral	Agree	Strongly agree	Strongly agree	Agree	Yes	Pharmaceutical preparations\ dietary supplements	Yes
Yes	30 years or less	Female	Diploma or Bachelor	Center	Unmarried	Less than 10000 SR	Non- healthcare worker	TRUE	TRUE	FALSE	FALSE	TRUE	TRUE	TRUE	FALSE	Neutral	Agree	Agree	Agree	Strongly agree	Agree	No			Cost	Yes	Yes
Yes	30 years or less	Female	High school or less	South	Unmarried	Less than 10000 SR	Non- healthcare worker	TRUE	FALSE	TRUE	TRUE	TRUE	TRUE	TRUE	FALSE	Disagree	Agree	Agree	Agree	Agree	Agree	No			I don`t know much about their benefits/uses	Don't know	Yes
Yes	30 years or less	Female	Postgraduate	South	Unmarried	Less than 10000 SR	Non- healthcare worker	TRUE	FALSE	TRUE	FALSE	TRUE	FALSE	TRUE	FALSE	Neutral	Strongly agree	Neutral	Neutral	Agree	Neutral	No			Possible side-effect	Don't know	Yes
Yes	30 years or less	Female	High school or less	Center	Unmarried	Less than 10000 SR	Non- healthcare worker	TRUE	TRUE	TRUE	TRUE	TRUE	TRUE	TRUE	TRUE	Neutral	Disagree	Neutral	Agree	Agree	Agree	No			Possible side-effect	Don't know	Yes
Yes	30 years or less	Female	Diploma or Bachelor	West	Unmarried	Less than 10000 SR	Non- healthcare worker	TRUE	FALSE	FALSE	TRUE	TRUE	TRUE	TRUE	FALSE	Agree	Strongly agree	Strongly agree	Agree	Agree	Neutral	No			Possible side-effect	Yes	Yes
Yes	30 years or less	Female	High school or less	West	Unmarried	Less than 10000 SR	Non- healthcare worker	TRUE	FALSE	FALSE	FALSE	TRUE	TRUE	TRUE	TRUE	Neutral	Strongly agree	Agree	Neutral	Neutral	Neutral	Yes	Natural sources	Yes
Yes	30 years or less	Female	Diploma or Bachelor	West	Unmarried	Less than 10000 SR	Non- healthcare worker	TRUE	FALSE	TRUE	FALSE	TRUE	TRUE	TRUE	FALSE	Disagree	Agree	Agree	Disagree	Strongly agree	Strongly agree	No			I don`t know much about their benefits/uses	Yes	Yes
Yes	More than 30 years	Female	High school or less	West	Unmarried	Less than 10000 SR	Non- healthcare worker	TRUE	FALSE	FALSE	TRUE	FALSE	TRUE	TRUE	TRUE	Neutral	Neutral	Agree	Neutral	Agree	Agree	Yes	Natural sources	Don't know
Yes	30 years or less	Female	Postgraduate	Center	Unmarried	Less than 10000 SR	Non- healthcare worker	TRUE	FALSE	FALSE	FALSE	TRUE	FALSE	TRUE	FALSE	Neutral	Agree	Agree	Agree	Strongly agree	Neutral	Yes	Pharmaceutical preparations\ dietary supplements	Yes
Yes	30 years or less	Female	Diploma or Bachelor	West	Unmarried	More than 20000 SR	Non- healthcare worker	TRUE	FALSE	FALSE	TRUE	TRUE	TRUE	TRUE	FALSE	Neutral	Neutral	Neutral	Agree	Strongly agree	Strongly agree	Yes	Natural sources	Yes
Yes	30 years or less	Female	High school or less	Center	Unmarried	Less than 10000 SR	Non- healthcare worker	TRUE	FALSE	TRUE	FALSE	TRUE	FALSE	TRUE	TRUE	Agree	Strongly agree	Strongly agree	Agree	Strongly agree	Disagree	Yes	Natural sources	Don't know
Yes	30 years or less	Female	Diploma or Bachelor	South	Unmarried	From 10000 to 20000 SR	Non- healthcare worker	FALSE	FALSE	FALSE	FALSE	TRUE	TRUE	TRUE	TRUE	Strongly disagree	Agree	Strongly agree	Strongly agree	Strongly agree	Strongly agree	Yes	Pharmaceutical preparations\ dietary supplements	Don't know
Yes	30 years or less	Female	High school or less	East	Unmarried	Less than 10000 SR	Non- healthcare worker	TRUE	TRUE	FALSE	FALSE	TRUE	FALSE	TRUE	FALSE	Strongly agree	Strongly agree	Strongly disagree	Neutral	Strongly agree	Disagree	Yes	Pharmaceutical preparations\ dietary supplements	No
Yes	30 years or less	Female	High school or less	South	Unmarried	Less than 10000 SR	Non- healthcare worker	TRUE	FALSE	TRUE	TRUE	FALSE	TRUE	TRUE	TRUE	Agree	Agree	Neutral	Agree	Agree	Agree	No			I don`t know much about their benefits/uses	Don't know	Yes
Yes	30 years or less	Female	High school or less	Center	Unmarried	Less than 10000 SR	Non- healthcare worker	TRUE	FALSE	TRUE	FALSE	TRUE	TRUE	TRUE	FALSE	Disagree	Neutral	Disagree	Agree	Agree	Strongly agree	No			Possible side-effect	Don't know	Yes
Yes	30 years or less	Female	High school or less	East	Unmarried	Less than 10000 SR	Non- healthcare worker	TRUE	FALSE	FALSE	TRUE	TRUE	TRUE	TRUE	FALSE	Neutral	Neutral	Agree	Neutral	Neutral	Agree	No			I don’t believe I need them	No	Yes
Yes	30 years or less	Female	Diploma or Bachelor	North	Unmarried	Less than 10000 SR	Non- healthcare worker	TRUE	FALSE	TRUE	FALSE	TRUE	TRUE	TRUE	FALSE	Disagree	Agree	Agree	Agree	Agree	Neutral	No			I don’t believe I need them	Don't know	Yes
Yes	30 years or less	Female	High school or less	Center	Unmarried	Less than 10000 SR	Non- healthcare worker	TRUE	FALSE	FALSE	TRUE	TRUE	FALSE	TRUE	TRUE	Neutral	Neutral	Agree	Agree	Agree	Strongly disagree	No			I don`t know much about their benefits/uses	Yes	Yes
Yes	30 years or less	Female	Diploma or Bachelor	Center	Unmarried	Less than 10000 SR	Non- healthcare worker	TRUE	FALSE	FALSE	TRUE	TRUE	TRUE	TRUE	TRUE	Disagree	Agree	Agree	Agree	Agree	Agree	No			I don`t know much about their benefits/uses	Yes	Yes
Yes	30 years or less	Female	High school or less	Center	Unmarried	Less than 10000 SR	Non- healthcare worker	TRUE	FALSE	FALSE	TRUE	FALSE	TRUE	TRUE	TRUE	Neutral	Strongly agree	Strongly agree	Disagree	Strongly agree	Strongly agree	Yes	Natural sources	Don't know
Yes	30 years or less	Male	High school or less	Center	Unmarried	Less than 10000 SR	Non- healthcare worker	TRUE	FALSE	TRUE	FALSE	TRUE	FALSE	TRUE	TRUE	Neutral	Agree	Agree	Agree	Agree	Neutral	No			I don`t know much about their benefits/uses	Don't know	Don't know
Yes	30 years or less	Female	High school or less	Center	Unmarried	Less than 10000 SR	Non- healthcare worker	TRUE	TRUE	TRUE	FALSE	FALSE	TRUE	TRUE	TRUE	Neutral	Disagree	Neutral	Neutral	Agree	Strongly agree	No			I don’t believe I need them	Yes	Yes
Yes	30 years or less	Female	High school or less	Center	Unmarried	Less than 10000 SR	Non- healthcare worker	TRUE	FALSE	TRUE	TRUE	TRUE	TRUE	FALSE	TRUE	Agree	Neutral	Agree	Agree	Agree	Neutral	Yes	Natural sources	Don't know
Yes	30 years or less	Male	High school or less	Center	Unmarried	Less than 10000 SR	Non- healthcare worker	FALSE	FALSE	FALSE	TRUE	TRUE	TRUE	TRUE	TRUE	Agree	Strongly agree	Strongly agree	Neutral	Strongly agree	Strongly disagree	No			I don`t know much about their benefits/uses	Yes	Yes
Yes	30 years or less	Male	High school or less	Center	Unmarried	Less than 10000 SR	Non- healthcare worker	TRUE	TRUE	TRUE	TRUE	TRUE	TRUE	TRUE	TRUE	Neutral	Neutral	Neutral	Agree	Neutral	Neutral	No			I don’t believe I need them	Don't know	Yes
Yes	30 years or less	Male	High school or less	East	Unmarried	Less than 10000 SR	Non- healthcare worker	TRUE	FALSE	FALSE	FALSE	TRUE	TRUE	TRUE	TRUE	Agree	Disagree	Neutral	Agree	Agree	Neutral	No			I don`t know much about their benefits/uses	Don't know	Yes
Yes	30 years or less	Female	Diploma or Bachelor	Center	Unmarried	Less than 10000 SR	Non- healthcare worker	TRUE	TRUE	TRUE	TRUE	TRUE	FALSE	TRUE	TRUE	Strongly disagree	Agree	Agree	Neutral	Neutral	Neutral	No			I don’t believe I need them	Don't know	Yes
Yes	30 years or less	Male	High school or less	Center	Unmarried	Less than 10000 SR	Non- healthcare worker	FALSE	TRUE	TRUE	FALSE	TRUE	FALSE	TRUE	TRUE	Agree	Neutral	Agree	Strongly agree	Strongly agree	Strongly agree	Yes	Pharmaceutical preparations\ dietary supplements	Yes
Yes	30 years or less	Male	High school or less	Center	Unmarried	Less than 10000 SR	Non- healthcare worker	TRUE	TRUE	TRUE	TRUE	TRUE	TRUE	TRUE	TRUE	Strongly agree	Strongly agree	Strongly agree	Neutral	Strongly agree	Agree	No			I don`t know much about their benefits/uses	Yes	Yes
Yes	30 years or less	Female	High school or less	Center	Unmarried	Less than 10000 SR	Non- healthcare worker	TRUE	FALSE	TRUE	FALSE	FALSE	TRUE	TRUE	FALSE	Disagree	Agree	Neutral	Strongly disagree	Strongly disagree	Strongly disagree	Yes	Natural sources	Don't know
Yes	30 years or less	Female	High school or less	Center	Unmarried	Less than 10000 SR	Non- healthcare worker	TRUE	FALSE	FALSE	FALSE	FALSE	TRUE	TRUE	FALSE	Neutral	Neutral	Agree	Neutral	Neutral	Neutral	No			I don`t know much about their benefits/uses	No	Don't know
Yes	30 years or less	Male	High school or less	Center	Unmarried	Less than 10000 SR	Non- healthcare worker	TRUE	FALSE	FALSE	TRUE	FALSE	TRUE	TRUE	TRUE	Disagree	Neutral	Agree	Agree	Strongly agree	Disagree	Yes	Natural sources	Yes
Yes	30 years or less	Female	High school or less	Center	Unmarried	Less than 10000 SR	Non- healthcare worker	TRUE	FALSE	TRUE	FALSE	TRUE	FALSE	TRUE	TRUE	Disagree	Neutral	Agree	Agree	Agree	Neutral	No			I don`t know much about their benefits/uses	Yes	Yes
Yes	30 years or less	Male	High school or less	Center	Unmarried	Less than 10000 SR	Non- healthcare worker	TRUE	TRUE	TRUE	TRUE	TRUE	TRUE	TRUE	TRUE	Disagree	Disagree	Agree	Agree	Strongly agree	Agree	No			I don`t know much about their benefits/uses	Yes	Yes
Yes	30 years or less	Male	High school or less	Center	Unmarried	Less than 10000 SR	Non- healthcare worker	FALSE	TRUE	FALSE	TRUE	FALSE	FALSE	TRUE	FALSE	Neutral	Agree	Agree	Neutral	Agree	Neutral	No			I don`t know much about their benefits/uses	Yes	Yes
Yes	30 years or less	Male	High school or less	Center	Unmarried	Less than 10000 SR	Non- healthcare worker	TRUE	FALSE	TRUE	FALSE	TRUE	TRUE	FALSE	FALSE	Neutral	Neutral	Neutral	Neutral	Strongly agree	Agree	No			I don`t know much about their benefits/uses	Don't know	Don't know
Yes	30 years or less	Female	High school or less	West	Unmarried	Less than 10000 SR	Non- healthcare worker	TRUE	FALSE	TRUE	FALSE	TRUE	FALSE	TRUE	FALSE	Strongly agree	Agree	Neutral	Agree	Neutral	Strongly agree	No			Possible side-effect	Yes	Yes
Yes	30 years or less	Female	High school or less	West	Unmarried	Less than 10000 SR	Non- healthcare worker	TRUE	FALSE	FALSE	FALSE	FALSE	TRUE	TRUE	TRUE	Disagree	Neutral	Agree	Disagree	Strongly agree	Neutral	Yes	Natural sources	Yes
Yes	30 years or less	Male	High school or less	East	Unmarried	Less than 10000 SR	Non- healthcare worker	TRUE	FALSE	FALSE	FALSE	TRUE	FALSE	FALSE	FALSE	Strongly agree	Agree	Agree	Agree	Neutral	Agree	No			I don`t know much about their benefits/uses	Yes	Yes
Yes	30 years or less	Male	High school or less	South	Unmarried	Less than 10000 SR	Non- healthcare worker	TRUE	FALSE	TRUE	TRUE	FALSE	TRUE	TRUE	FALSE	Neutral	Agree	Agree	Agree	Agree	Neutral	No			Cost	No	Yes
Yes	30 years or less	Male	Diploma or Bachelor	East	Unmarried	Less than 10000 SR	Non- healthcare worker	FALSE	TRUE	TRUE	FALSE	FALSE	TRUE	TRUE	TRUE	Strongly agree	Neutral	Neutral	Disagree	Disagree	Disagree	Yes	I have no preference (both can be used)	Don't know
Yes	30 years or less	Female	High school or less	Center	Unmarried	Less than 10000 SR	Non- healthcare worker	TRUE	TRUE	TRUE	TRUE	TRUE	FALSE	TRUE	TRUE	Agree	Neutral	Agree	Agree	Agree	Neutral	No			I don`t know much about their benefits/uses	Yes	Yes
Yes	30 years or less	Female	High school or less	Center	Unmarried	Less than 10000 SR	Non- healthcare worker	TRUE	TRUE	FALSE	FALSE	FALSE	TRUE	TRUE	TRUE	Neutral	Disagree	Neutral	Neutral	Agree	Agree	Yes	Natural sources	Don't know
Yes	More than 30 years	Male	High school or less	East	Married	Less than 10000 SR	Non- healthcare worker	TRUE	TRUE	TRUE	TRUE	FALSE	TRUE	TRUE	FALSE	Strongly agree	Agree	Strongly agree	Agree	Agree	Agree	No			Possible side-effect	Don't know	Don't know
Yes	30 years or less	Male	Postgraduate	East	Married	Less than 10000 SR	Non- healthcare worker	TRUE	TRUE	TRUE	TRUE	TRUE	TRUE	FALSE	FALSE	Strongly agree	Strongly agree	Strongly agree	Strongly agree	Agree	Agree	No			Possible side-effect	Yes	Yes
Yes	More than 30 years	Male	High school or less	East	Married	Less than 10000 SR	Non- healthcare worker	TRUE	TRUE	TRUE	TRUE	TRUE	TRUE	TRUE	TRUE	Strongly agree	Strongly agree	Strongly agree	Strongly agree	Strongly agree	Strongly agree	Yes	Natural sources	Yes
Yes	30 years or less	Male	High school or less	East	Unmarried	Less than 10000 SR	Non- healthcare worker	FALSE	TRUE	TRUE	TRUE	TRUE	TRUE	TRUE	TRUE	Strongly agree	Strongly agree	Agree	Agree	Strongly agree	Strongly agree	No			I don’t believe I need them	Yes	Yes
Yes	30 years or less	Male	Diploma or Bachelor	Center	Unmarried	Less than 10000 SR	Healthcare worker	TRUE	TRUE	TRUE	TRUE	TRUE	TRUE	TRUE	TRUE	Strongly agree	Neutral	Strongly agree	Strongly agree	Strongly agree	Strongly agree	Yes	Pharmaceutical preparations\ dietary supplements	Yes
Yes	More than 30 years	Male	Diploma or Bachelor	East	Married	More than 20000 SR	Non- healthcare worker	TRUE	FALSE	TRUE	FALSE	TRUE	TRUE	TRUE	FALSE	Strongly agree	Strongly agree	Agree	Agree	Strongly agree	Neutral	Yes	I have no preference (both can be used)	Don't know
Yes	30 years or less	Male	High school or less	East	Married	Less than 10000 SR	Non- healthcare worker	TRUE	TRUE	TRUE	TRUE	TRUE	TRUE	TRUE	TRUE	Agree	Agree	Agree	Agree	Agree	Agree	Yes	Natural sources	Yes
Yes	More than 30 years	Male	High school or less	East	Married	More than 20000 SR	Non- healthcare worker	TRUE	TRUE	TRUE	FALSE	FALSE	FALSE	FALSE	FALSE	Disagree	Strongly disagree	Agree	Neutral	Strongly disagree	Disagree	No			I don’t believe I need them	Don't know	No
Yes	30 years or less	Male	High school or less	Center	Unmarried	Less than 10000 SR	Non- healthcare worker	TRUE	FALSE	TRUE	FALSE	FALSE	TRUE	TRUE	FALSE	Disagree	Strongly disagree	Disagree	Agree	Disagree	Disagree	No			I don`t know much about their benefits/uses	No	Yes
Yes	30 years or less	Female	High school or less	West	Unmarried	Less than 10000 SR	Non- healthcare worker	FALSE	TRUE	FALSE	TRUE	TRUE	TRUE	TRUE	TRUE	Neutral	Neutral	Strongly agree	Agree	Neutral	Agree	Yes	Natural sources	Yes
Yes	30 years or less	Female	High school or less	West	Unmarried	Less than 10000 SR	Non- healthcare worker	TRUE	FALSE	FALSE	FALSE	FALSE	TRUE	TRUE	TRUE	Disagree	Disagree	Agree	Agree	Disagree	Disagree	No			I don’t believe I need them	Don't know	Yes
Yes	More than 30 years	Male	Diploma or Bachelor	East	Married	More than 20000 SR	Non- healthcare worker	TRUE	FALSE	FALSE	FALSE	FALSE	TRUE	TRUE	FALSE	Neutral	Agree	Agree	Agree	Strongly agree	Neutral	No			Cost	Yes	Don't know
Yes	30 years or less	Female	High school or less	West	Unmarried	Less than 10000 SR	Non- healthcare worker	TRUE	FALSE	FALSE	FALSE	FALSE	TRUE	TRUE	FALSE	Neutral	Neutral	Neutral	Agree	Agree	Neutral	No			I don`t know much about their benefits/uses	Yes	Yes
Yes	30 years or less	Female	High school or less	West	Unmarried	Less than 10000 SR	Non- healthcare worker	TRUE	FALSE	FALSE	TRUE	TRUE	TRUE	TRUE	TRUE	Neutral	Agree	Agree	Disagree	Agree	Neutral	No			I don`t know much about their benefits/uses	Don't know	Yes
Yes	30 years or less	Female	High school or less	Center	Unmarried	Less than 10000 SR	Non- healthcare worker	TRUE	FALSE	FALSE	FALSE	FALSE	TRUE	TRUE	TRUE	Neutral	Agree	Agree	Agree	Strongly agree	Agree	No			I don`t know much about their benefits/uses	Yes	Yes
Yes	More than 30 years	Male	Postgraduate	West	Unmarried	More than 20000 SR	Non- healthcare worker	FALSE	FALSE	FALSE	FALSE	FALSE	FALSE	FALSE	FALSE	Disagree	Disagree	Disagree	Disagree	Disagree	Disagree	Yes	Natural sources	Yes
Yes	30 years or less	Female	Diploma or Bachelor	North	Unmarried	Less than 10000 SR	Non- healthcare worker	FALSE	FALSE	FALSE	FALSE	TRUE	TRUE	TRUE	TRUE	Neutral	Neutral	Agree	Agree	Strongly agree	Agree	No			I don`t know much about their benefits/uses	Yes	Yes
Yes	30 years or less	Female	High school or less	Center	Married	Less than 10000 SR	Non- healthcare worker	FALSE	TRUE	FALSE	FALSE	TRUE	TRUE	TRUE	TRUE	Strongly agree	Strongly agree	Strongly agree	Strongly agree	Strongly agree	Strongly agree	No			I don`t know much about their benefits/uses	Yes	Yes
Yes	30 years or less	Female	High school or less	Center	Unmarried	More than 20000 SR	Non- healthcare worker	TRUE	FALSE	TRUE	TRUE	TRUE	FALSE	TRUE	TRUE	Strongly agree	Agree	Strongly agree	Disagree	Strongly agree	Neutral	Yes	Natural sources	Don't know
Yes	30 years or less	Female	High school or less	Center	Unmarried	Less than 10000 SR	Non- healthcare worker	FALSE	FALSE	FALSE	TRUE	TRUE	TRUE	TRUE	FALSE	Agree	Strongly agree	Strongly agree	Agree	Agree	Neutral	Yes	I have no preference (both can be used)	Don't know
Yes	30 years or less	Female	High school or less	Center	Unmarried	Less than 10000 SR	Non- healthcare worker	TRUE	FALSE	FALSE	TRUE	FALSE	TRUE	TRUE	TRUE	Neutral	Neutral	Agree	Agree	Strongly agree	Neutral	No			I don`t know much about their benefits/uses	Yes	Yes
Yes	30 years or less	Female	High school or less	Center	Unmarried	Less than 10000 SR	Non- healthcare worker	FALSE	TRUE	FALSE	TRUE	FALSE	TRUE	TRUE	TRUE	Agree	Strongly agree	Strongly agree	Strongly agree	Agree	Neutral	Yes	I have no preference (both can be used)	Yes
Yes	30 years or less	Female	High school or less	Center	Unmarried	Less than 10000 SR	Non- healthcare worker	FALSE	FALSE	FALSE	FALSE	FALSE	FALSE	TRUE	TRUE	Neutral	Agree	Agree	Neutral	Agree	Neutral	Yes	Natural sources	Don't know
Yes	30 years or less	Female	High school or less	Center	Married	Less than 10000 SR	Non- healthcare worker	TRUE	FALSE	FALSE	TRUE	TRUE	TRUE	TRUE	FALSE	Neutral	Agree	Agree	Agree	Neutral	Agree	Yes	Natural sources	Yes
Yes	30 years or less	Female	High school or less	Center	Married	Less than 10000 SR	Non- healthcare worker	TRUE	FALSE	FALSE	TRUE	TRUE	TRUE	TRUE	TRUE	Neutral	Agree	Agree	Agree	Neutral	Agree	Yes	Natural sources	Yes
Yes	More than 30 years	Female	Diploma or Bachelor	Center	Married	Less than 10000 SR	Non- healthcare worker	FALSE	FALSE	FALSE	FALSE	FALSE	TRUE	TRUE	FALSE	Neutral	Agree	Agree	Agree	Strongly agree	Agree	No			I don`t know much about their benefits/uses	Yes	Yes
Yes	30 years or less	Female	Diploma or Bachelor	Center	Unmarried	Less than 10000 SR	Non- healthcare worker	TRUE	TRUE	FALSE	TRUE	TRUE	TRUE	TRUE	TRUE	Neutral	Strongly agree	Strongly agree	Disagree	Neutral	Disagree	Yes	Natural sources	Yes
Yes	30 years or less	Female	High school or less	Center	Unmarried	Less than 10000 SR	Non- healthcare worker	FALSE	TRUE	FALSE	FALSE	FALSE	TRUE	TRUE	FALSE	Disagree	Disagree	Disagree	Agree	Strongly agree	Strongly agree	No			I don`t know much about their benefits/uses	Yes	Yes
Yes	30 years or less	Female	Diploma or Bachelor	Center	Unmarried	Less than 10000 SR	Non- healthcare worker	FALSE	FALSE	TRUE	FALSE	TRUE	FALSE	FALSE	FALSE	Strongly agree	Neutral	Strongly disagree	Disagree	Disagree	Strongly agree	No			Cost	Don't know	Don't know
Yes	More than 30 years	Female	High school or less	Center	Married	From 10000 to 20000 SR	Non- healthcare worker	TRUE	FALSE	TRUE	FALSE	FALSE	TRUE	TRUE	FALSE	Strongly disagree	Strongly disagree	Agree	Agree	Strongly agree	Agree	No			I don`t know much about their benefits/uses	Yes	Yes
Yes	30 years or less	Female	High school or less	Center	Unmarried	Less than 10000 SR	Non- healthcare worker	FALSE	FALSE	TRUE	TRUE	TRUE	TRUE	TRUE	TRUE	Neutral	Agree	Agree	Strongly agree	Neutral	Neutral	No			I don’t believe I need them	Don't know	Yes
Yes	30 years or less	Female	Diploma or Bachelor	Center	Unmarried	Less than 10000 SR	Non- healthcare worker	TRUE	FALSE	FALSE	FALSE	TRUE	TRUE	TRUE	FALSE	Agree	Neutral	Strongly agree	Agree	Agree	Neutral	Yes	Natural sources	Yes
Yes	More than 30 years	Female	Postgraduate	Center	Married	From 10000 to 20000 SR	Healthcare worker	FALSE	FALSE	FALSE	FALSE	FALSE	FALSE	TRUE	TRUE	Agree	Neutral	Strongly agree	Neutral	Strongly agree	Agree	Yes	Pharmaceutical preparations\ dietary supplements	Don't know
Yes	More than 30 years	Male	Postgraduate	South	Married	From 10000 to 20000 SR	Non- healthcare worker	FALSE	TRUE	FALSE	FALSE	FALSE	TRUE	TRUE	TRUE	Strongly agree	Strongly agree	Strongly agree	Neutral	Agree	Neutral	Yes	Natural sources	Yes
Yes	More than 30 years	Male	Postgraduate	West	Married	More than 20000 SR	Healthcare worker	FALSE	FALSE	FALSE	FALSE	FALSE	TRUE	TRUE	TRUE	Disagree	Strongly agree	Strongly agree	Strongly agree	Strongly agree	Neutral	Yes	Natural sources	Yes
Yes	More than 30 years	Female	High school or less	South	Married	Less than 10000 SR	Non- healthcare worker	TRUE	TRUE	TRUE	TRUE	TRUE	TRUE	TRUE	TRUE	Agree	Agree	Agree	Agree	Agree	Agree	Yes	I have no preference (both can be used)	Don't know
Yes	More than 30 years	Female	Postgraduate	North	Married	More than 20000 SR	Non- healthcare worker	TRUE	FALSE	FALSE	FALSE	FALSE	FALSE	TRUE	TRUE	Agree	Strongly agree	Agree	Disagree	Agree	Neutral	No			Possible side-effect	Don't know	Don't know
Yes	More than 30 years	Male	Postgraduate	South	Married	From 10000 to 20000 SR	Non- healthcare worker	TRUE	FALSE	TRUE	TRUE	TRUE	TRUE	TRUE	TRUE	Strongly disagree	Neutral	Agree	Strongly agree	Strongly agree	Strongly disagree	No			Possible side-effect	Yes	Yes
Yes	More than 30 years	Female	Diploma or Bachelor	South	Married	From 10000 to 20000 SR	Non- healthcare worker	TRUE	TRUE	TRUE	TRUE	FALSE	TRUE	TRUE	TRUE	Neutral	Agree	Agree	Agree	Strongly agree	Neutral	No			Possible side-effect	Don't know	Yes
Yes	More than 30 years	Female	Diploma or Bachelor	South	Married	More than 20000 SR	Non- healthcare worker	TRUE	FALSE	FALSE	TRUE	TRUE	TRUE	TRUE	TRUE	Neutral	Neutral	Agree	Neutral	Agree	Neutral	Yes	Natural sources	Don't know
Yes	More than 30 years	Male	Postgraduate	West	Married	From 10000 to 20000 SR	Non- healthcare worker	FALSE	FALSE	FALSE	TRUE	TRUE	TRUE	TRUE	FALSE	Neutral	Agree	Neutral	Neutral	Agree	Neutral	Yes	Natural sources	Yes
Yes	More than 30 years	Female	Diploma or Bachelor	South	Unmarried	Less than 10000 SR	Non- healthcare worker	TRUE	FALSE	TRUE	TRUE	FALSE	FALSE	TRUE	TRUE	Disagree	Agree	Agree	Agree	Strongly agree	Neutral	Yes	Natural sources	Yes
Yes	More than 30 years	Female	Diploma or Bachelor	South	Married	Less than 10000 SR	Non- healthcare worker	TRUE	FALSE	TRUE	TRUE	TRUE	FALSE	TRUE	TRUE	Neutral	Neutral	Neutral	Agree	Agree	Neutral	No			I don`t know much about their benefits/uses	Don't know	Yes
Yes	More than 30 years	Female	Diploma or Bachelor	South	Unmarried	From 10000 to 20000 SR	Non- healthcare worker	TRUE	FALSE	FALSE	TRUE	TRUE	TRUE	TRUE	TRUE	Agree	Strongly agree	Strongly agree	Agree	Strongly agree	Disagree	Yes	Natural sources	Yes
Yes	More than 30 years	Female	Diploma or Bachelor	South	Unmarried	Less than 10000 SR	Non- healthcare worker	TRUE	FALSE	FALSE	FALSE	TRUE	TRUE	TRUE	FALSE	Neutral	Neutral	Neutral	Agree	Agree	Disagree	No			I don’t believe I need them	Yes	Yes
Yes	More than 30 years	Female	Postgraduate	South	Married	From 10000 to 20000 SR	Non- healthcare worker	TRUE	FALSE	TRUE	TRUE	TRUE	FALSE	TRUE	TRUE	Strongly agree	Strongly agree	Strongly agree	Neutral	Strongly agree	Neutral	Yes	Natural sources	Yes
Yes	More than 30 years	Female	Diploma or Bachelor	South	Married	Less than 10000 SR	Non- healthcare worker	FALSE	TRUE	FALSE	FALSE	TRUE	TRUE	TRUE	FALSE	Neutral	Neutral	Neutral	Neutral	Strongly agree	Neutral	No			I don’t believe in their effectiveness	Don't know	Yes
Yes	More than 30 years	Female	Diploma or Bachelor	South	Married	Less than 10000 SR	Non- healthcare worker	TRUE	TRUE	TRUE	FALSE	FALSE	FALSE	TRUE	TRUE	Strongly agree	Strongly agree	Strongly agree	Disagree	Neutral	Strongly agree	No			Cost	Don't know	Yes
Yes	More than 30 years	Female	Diploma or Bachelor	South	Married	Less than 10000 SR	Non- healthcare worker	TRUE	FALSE	TRUE	TRUE	TRUE	TRUE	TRUE	TRUE	Neutral	Strongly agree	Strongly agree	Strongly agree	Strongly agree	Strongly agree	Yes	Natural sources	Yes
Yes	More than 30 years	Male	Postgraduate	South	Married	More than 20000 SR	Non- healthcare worker	FALSE	FALSE	FALSE	FALSE	FALSE	FALSE	TRUE	FALSE	Disagree	Disagree	Strongly disagree	Strongly disagree	Strongly disagree	Strongly disagree	No			I don`t know much about their benefits/uses	Don't know	Don't know
Yes	More than 30 years	Female	Postgraduate	North	Married	Less than 10000 SR	Non- healthcare worker	FALSE	FALSE	FALSE	FALSE	TRUE	TRUE	TRUE	TRUE	Agree	Agree	Strongly agree	Agree	Strongly agree	Disagree	Yes	Pharmaceutical preparations\ dietary supplements	Yes
Yes	More than 30 years	Female	Diploma or Bachelor	West	Married	Less than 10000 SR	Non- healthcare worker	TRUE	FALSE	TRUE	TRUE	TRUE	TRUE	TRUE	TRUE	Neutral	Neutral	Neutral	Neutral	Agree	Neutral	Yes	Natural sources	Don't know
Yes	More than 30 years	Female	Diploma or Bachelor	North	Unmarried	From 10000 to 20000 SR	Non- healthcare worker	TRUE	TRUE	TRUE	TRUE	TRUE	FALSE	TRUE	TRUE	Agree	Agree	Agree	Neutral	Neutral	Disagree	Yes	Pharmaceutical preparations\ dietary supplements	Yes
Yes	More than 30 years	Female	Postgraduate	North	Unmarried	From 10000 to 20000 SR	Non- healthcare worker	FALSE	FALSE	FALSE	FALSE	FALSE	TRUE	TRUE	TRUE	Strongly agree	Strongly agree	Strongly agree	Disagree	Agree	Disagree	Yes	Natural sources	Yes
Yes	More than 30 years	Female	Diploma or Bachelor	Center	Unmarried	Less than 10000 SR	Non- healthcare worker	TRUE	FALSE	TRUE	FALSE	TRUE	FALSE	TRUE	TRUE	Agree	Agree	Neutral	Disagree	Agree	Neutral	No			I don’t believe I need them	Yes	Yes
Yes	30 years or less	Female	Diploma or Bachelor	Center	Married	Less than 10000 SR	Non- healthcare worker	TRUE	FALSE	TRUE	TRUE	TRUE	FALSE	TRUE	TRUE	Strongly agree	Strongly agree	Strongly agree	Agree	Strongly agree	Neutral	No			I don`t know much about their benefits/uses	Yes	Yes
Yes	More than 30 years	Female	Diploma or Bachelor	North	Married	Less than 10000 SR	Non- healthcare worker	TRUE	TRUE	TRUE	TRUE	TRUE	TRUE	TRUE	TRUE	Agree	Agree	Agree	Agree	Strongly agree	Agree	Yes	Natural sources	Yes
Yes	More than 30 years	Female	Postgraduate	North	Married	Less than 10000 SR	Non- healthcare worker	TRUE	FALSE	TRUE	TRUE	TRUE	TRUE	TRUE	TRUE	Agree	Agree	Agree	Agree	Agree	Neutral	Yes	Natural sources	Yes
Yes	30 years or less	Female	Diploma or Bachelor	South	Unmarried	Less than 10000 SR	Non- healthcare worker	FALSE	FALSE	FALSE	FALSE	FALSE	TRUE	TRUE	TRUE	Strongly agree	Neutral	Strongly agree	Neutral	Agree	Strongly disagree	Yes	Natural sources	Yes
Yes	More than 30 years	Female	Diploma or Bachelor	South	Married	Less than 10000 SR	Non- healthcare worker	TRUE	FALSE	TRUE	FALSE	TRUE	TRUE	TRUE	TRUE	Strongly agree	Strongly agree	Strongly agree	Agree	Strongly agree	Strongly agree	Yes	Natural sources	Yes
Yes	30 years or less	Female	High school or less	Center	Unmarried	Less than 10000 SR	Non- healthcare worker	TRUE	FALSE	FALSE	TRUE	FALSE	TRUE	TRUE	FALSE	Neutral	Disagree	Disagree	Disagree	Strongly agree	Neutral	No			I don’t believe I need them	Yes	Yes
Yes	More than 30 years	Female	Diploma or Bachelor	East	Married	Less than 10000 SR	Non- healthcare worker	TRUE	FALSE	FALSE	TRUE	FALSE	TRUE	TRUE	TRUE	Neutral	Neutral	Agree	Neutral	Agree	Neutral	No			I don’t believe I need them	Don't know	Yes
Yes	More than 30 years	Female	Diploma or Bachelor	North	Married	Less than 10000 SR	Non- healthcare worker	TRUE	TRUE	TRUE	TRUE	FALSE	TRUE	TRUE	FALSE	Disagree	Disagree	Neutral	Agree	Neutral	Neutral	No			Possible side-effect	Don't know	Don't know
Yes	More than 30 years	Male	Postgraduate	South	Married	More than 20000 SR	Healthcare worker	TRUE	FALSE	FALSE	FALSE	FALSE	TRUE	TRUE	TRUE	Agree	Agree	Agree	Agree	Agree	Agree	Yes	Pharmaceutical preparations\ dietary supplements	Yes
Yes	More than 30 years	Female	Postgraduate	South	Married	From 10000 to 20000 SR	Non- healthcare worker	TRUE	FALSE	FALSE	TRUE	TRUE	TRUE	TRUE	FALSE	Agree	Agree	Agree	Agree	Agree	Agree	Yes	Natural sources	No
Yes	More than 30 years	Female	Postgraduate	South	Married	Less than 10000 SR	Non- healthcare worker	TRUE	TRUE	FALSE	TRUE	TRUE	TRUE	TRUE	TRUE	Strongly agree	Strongly agree	Strongly agree	Neutral	Agree	Disagree	Yes	Natural sources	Yes
Yes	More than 30 years	Female	Postgraduate	South	Married	More than 20000 SR	Healthcare worker	TRUE	FALSE	FALSE	TRUE	FALSE	FALSE	TRUE	TRUE	Neutral	Neutral	Agree	Agree	Agree	Agree	Yes	Pharmaceutical preparations\ dietary supplements	Yes
Yes	More than 30 years	Male	Diploma or Bachelor	North	Married	More than 20000 SR	Non- healthcare worker	TRUE	FALSE	FALSE	TRUE	TRUE	TRUE	TRUE	TRUE	Strongly agree	Strongly agree	Strongly agree	Strongly agree	Strongly agree	Strongly agree	Yes	Natural sources	Yes
Yes	More than 30 years	Female	Diploma or Bachelor	East	Married	Less than 10000 SR	Non- healthcare worker	TRUE	TRUE	TRUE	FALSE	TRUE	TRUE	TRUE	FALSE	Neutral	Agree	Agree	Agree	Strongly agree	Neutral	No			I don`t know much about their benefits/uses	Yes	Yes
Yes	More than 30 years	Female	Postgraduate	South	Married	Less than 10000 SR	Non- healthcare worker	TRUE	FALSE	FALSE	FALSE	TRUE	TRUE	TRUE	TRUE	Neutral	Disagree	Agree	Agree	Strongly agree	Strongly disagree	Yes	Natural sources	Yes
Yes	30 years or less	Female	Diploma or Bachelor	South	Unmarried	Less than 10000 SR	Non- healthcare worker	TRUE	FALSE	FALSE	FALSE	FALSE	TRUE	TRUE	FALSE	Neutral	Neutral	Neutral	Neutral	Neutral	Neutral	No			I don’t believe I need them	Don't know	Don't know
Yes	More than 30 years	Male	Diploma or Bachelor	Center	Married	From 10000 to 20000 SR	Non- healthcare worker	TRUE	FALSE	FALSE	TRUE	FALSE	TRUE	TRUE	FALSE	Neutral	Neutral	Agree	Agree	Agree	Agree	Yes	I have no preference (both can be used)	Yes
Yes	More than 30 years	Female	Diploma or Bachelor	Center	Married	Less than 10000 SR	Non- healthcare worker	TRUE	TRUE	FALSE	TRUE	TRUE	TRUE	TRUE	TRUE	Agree	Strongly agree	Strongly agree	Strongly agree	Agree	Strongly disagree	Yes	Natural sources	Yes
Yes	More than 30 years	Male	Diploma or Bachelor	Center	Married	From 10000 to 20000 SR	Non- healthcare worker	TRUE	FALSE	FALSE	FALSE	TRUE	TRUE	TRUE	TRUE	Disagree	Strongly disagree	Disagree	Agree	Agree	Disagree	No			I don`t know much about their benefits/uses	No	Yes
Yes	More than 30 years	Male	Diploma or Bachelor	Center	Married	From 10000 to 20000 SR	Healthcare worker	FALSE	FALSE	FALSE	FALSE	FALSE	FALSE	TRUE	TRUE	Neutral	Strongly agree	Agree	Agree	Agree	Strongly disagree	Yes	Natural sources	Yes
Yes	More than 30 years	Female	High school or less	Center	Married	Less than 10000 SR	Non- healthcare worker	TRUE	FALSE	FALSE	FALSE	FALSE	FALSE	TRUE	TRUE	Strongly disagree	Agree	Strongly agree	Agree	Strongly agree	Strongly disagree	Yes	Natural sources	Yes
Yes	More than 30 years	Female	Diploma or Bachelor	Center	Married	Less than 10000 SR	Non- healthcare worker	TRUE	FALSE	FALSE	FALSE	FALSE	TRUE	TRUE	TRUE	Strongly agree	Strongly agree	Strongly agree	Agree	Agree	Strongly disagree	Yes	Natural sources	Yes
Yes	More than 30 years	Female	Diploma or Bachelor	Center	Married	From 10000 to 20000 SR	Non- healthcare worker	TRUE	FALSE	TRUE	FALSE	TRUE	TRUE	TRUE	FALSE	Neutral	Neutral	Neutral	Neutral	Agree	Neutral	No			I don’t believe I need them	Don't know	Yes
Yes	More than 30 years	Female	High school or less	West	Married	Less than 10000 SR	Non- healthcare worker	TRUE	FALSE	TRUE	FALSE	TRUE	TRUE	TRUE	FALSE	Agree	Neutral	Neutral	Neutral	Neutral	Neutral	No			I don’t believe I need them	Don't know	Don't know
Yes	More than 30 years	Female	Diploma or Bachelor	Center	Married	From 10000 to 20000 SR	Non- healthcare worker	TRUE	FALSE	FALSE	TRUE	TRUE	FALSE	TRUE	TRUE	Neutral	Agree	Neutral	Disagree	Disagree	Disagree	Yes	Natural sources	Yes
Yes	More than 30 years	Female	Diploma or Bachelor	Center	Married	From 10000 to 20000 SR	Non- healthcare worker	TRUE	TRUE	TRUE	FALSE	TRUE	TRUE	TRUE	TRUE	Agree	Agree	Agree	Agree	Agree	Agree	Yes	Natural sources	Yes
Yes	30 years or less	Female	Diploma or Bachelor	Center	Married	Less than 10000 SR	Non- healthcare worker	TRUE	FALSE	TRUE	TRUE	TRUE	FALSE	TRUE	TRUE	Agree	Strongly agree	Strongly agree	Agree	Strongly agree	Neutral	Yes	Natural sources	Yes
Yes	More than 30 years	Female	Diploma or Bachelor	South	Married	Less than 10000 SR	Non- healthcare worker	TRUE	TRUE	TRUE	TRUE	TRUE	TRUE	TRUE	TRUE	Agree	Agree	Agree	Agree	Agree	Agree	Yes	Natural sources	Don't know
Yes	More than 30 years	Female	Diploma or Bachelor	Center	Married	From 10000 to 20000 SR	Non- healthcare worker	TRUE	FALSE	TRUE	FALSE	FALSE	TRUE	TRUE	TRUE	Neutral	Disagree	Agree	Strongly agree	Strongly agree	Disagree	No			I don’t believe I need them	Yes	Yes
Yes	More than 30 years	Female	Diploma or Bachelor	Center	Married	From 10000 to 20000 SR	Non- healthcare worker	TRUE	TRUE	TRUE	TRUE	TRUE	TRUE	TRUE	TRUE	Agree	Agree	Agree	Agree	Agree	Disagree	Yes	Natural sources	Yes
Yes	More than 30 years	Male	Diploma or Bachelor	Center	Married	Less than 10000 SR	Non- healthcare worker	TRUE	FALSE	TRUE	FALSE	TRUE	TRUE	TRUE	TRUE	Strongly agree	Strongly agree	Strongly agree	Agree	Strongly agree	Disagree	Yes	Natural sources	Yes
Yes	More than 30 years	Male	Diploma or Bachelor	Center	Married	From 10000 to 20000 SR	Non- healthcare worker	TRUE	TRUE	FALSE	TRUE	TRUE	TRUE	TRUE	FALSE	Neutral	Strongly agree	Agree	Disagree	Strongly agree	Strongly agree	Yes	Natural sources	Yes
Yes	30 years or less	Male	High school or less	Center	Unmarried	Less than 10000 SR	Non- healthcare worker	TRUE	TRUE	TRUE	TRUE	TRUE	TRUE	TRUE	FALSE	Agree	Agree	Agree	Strongly agree	Strongly agree	Agree	No			I don`t know much about their benefits/uses	Yes	Yes
Yes	30 years or less	Female	Diploma or Bachelor	Center	Unmarried	Less than 10000 SR	Non- healthcare worker	TRUE	TRUE	TRUE	TRUE	TRUE	TRUE	TRUE	TRUE	Agree	Neutral	Neutral	Agree	Agree	Agree	Yes	I have no preference (both can be used)	Don't know
Yes	30 years or less	Female	High school or less	Center	Unmarried	Less than 10000 SR	Non- healthcare worker	TRUE	FALSE	TRUE	FALSE	FALSE	TRUE	TRUE	TRUE	Neutral	Strongly agree	Strongly agree	Strongly agree	Strongly agree	Agree	No			I don`t know much about their benefits/uses	Yes	Yes
Yes	30 years or less	Female	High school or less	Center	Unmarried	Less than 10000 SR	Non- healthcare worker	TRUE	FALSE	FALSE	TRUE	TRUE	FALSE	TRUE	TRUE	Neutral	Strongly agree	Agree	Strongly agree	Strongly agree	Disagree	No			I don`t know much about their benefits/uses	Yes	Yes
Yes	More than 30 years	Female	Diploma or Bachelor	Center	Married	Less than 10000 SR	Non- healthcare worker	TRUE	FALSE	FALSE	FALSE	FALSE	FALSE	TRUE	TRUE	Strongly agree	Strongly agree	Strongly agree	Strongly agree	Strongly agree	Strongly disagree	Yes	Natural sources	Yes
Yes	30 years or less	Female	Diploma or Bachelor	Center	Unmarried	From 10000 to 20000 SR	Healthcare worker	TRUE	FALSE	TRUE	TRUE	TRUE	TRUE	TRUE	FALSE	Neutral	Strongly agree	Agree	Agree	Strongly agree	Neutral	No			I don’t believe I need them	Yes	Yes
Yes	30 years or less	Female	Diploma or Bachelor	Center	Unmarried	Less than 10000 SR	Healthcare worker	TRUE	FALSE	FALSE	FALSE	TRUE	TRUE	TRUE	FALSE	Agree	Disagree	Neutral	Agree	Agree	Strongly agree	Yes	Pharmaceutical preparations\ dietary supplements	Yes
